# Supplementary material for: One-step isothermal detection of multiple KRAS mutations by forming SNP specific hairpins on a gold nanoshell
Source: Royal Society of Chemistry journal article supplement (doi:10.1039/c8an00525g), 2018-01-01
Supplement: c8an00525g1.pdf [file c8an00525g1.pdf]

Supporting Information

# **One-step isothermal detection of multiple KRAS mutations by forming SNP specific hairpins on a gold nanoshell**

Chan Ho Chung and Joong Hyun Kim\*

## ***Materials and methods***

### ***Materials***

All chemicals were purchased from Sigma-Aldrich (St. Louis, MO) except when mentioned specifically and used without further purification. The oligonucleotides were purchased from Bioneer (Daejeon, South Korea).

### ***Synthesis of AuNS***

AuNS (diameter: ~128 nm) with 26 nm shell thickness was synthesized according to the previous method.<sup>1</sup> First, silica nanoparticles were prepared by the Stöber method. 1. 5 mL of tetraethyl orthosilicate (TEOS) was added into 45 mL of ethanol containing 2.8 mL of NH<sub>4</sub>OH (14.8 N). After 8-hour reaction, 126 µL of APTES was added into the mixture. After 8-hour incubation, the APTES treated silica cores were boiled for 2-hour. For removing unreacted reagents, centrifuge the silica cores for 30 minutes at 2000 g. After discarding supernatant, the pellet was suspended in 50 mL of fresh ethanol using a probe sonicator (VC 750, Sonics) for 10 minutes. The centrifugal purification of the silica core was repeated two times more. Then access seed gold colloids (2~3 nm) were added into silica cores. After overnight incubation, the mixture was suspended in 10 mL of ultra-pure water followed by centrifugal removal of the unbounded seed gold at 2000 g for 30 minutes. The centrifugal removal steps were repeated two more times. The seed gold colloids attached silica cores were mixed with 1mL of 0.0148 % HAuCl<sub>4</sub>. Growth of nanoshell was initiated by addition of 6.7 µL of 30 % formaldehyde followed by vigorous vortexing for 10 minutes. Thickness of nanoshell could be controlled by varying the amount of silica cores. In order to measure size, and shell thickness of the nanoshell, high resolution images of the synthesized nanoparticles were obtained using TEM (JEM-2100F, JEOL).

### ***Immobilization of Oligonucleotides on AuNS***

1 All the oligonucleotides (TabeS1) were purchased from Bioneer (Daejeon, South Korea).  
2 Thiols of FP1 (5'(OP)-CAGCTCCAACA-(SH)3') were activated by treatment with 10 mM  
3 TCEP in 10 mM sodium phosphate buffer (pH 7.0) for 30 minutes at room temperature. 200-  
4 fold molar excess of the thiol activated FP1 were mixed with AuNS in 1 mL of ultra-pure  
5 water for 16 hours at room temperature. To increase the density of FP1 coverage on the gold  
6 surface, NaCl concentration was gradually increased up to 0.1 M. After an additional 48 hours,  
7 the excess free FP1 was removed by centrifugation at 8,000 rpm for 25 minutes in ultra-pure  
8 water, repeated four times. The primer modified AuNS were redispersed in 200  $\mu$ L of the  
9 water at room temperature.

10

### 11 *Gel electrophoresis of oligonucleotides*

12 Electrophoresis of the used oligonucleotides and ligated products was performed by loading  
13 the samples into TBE polyacrylamide gel (4~20%) and running the gel at 180 V for 50  
14 minutes. After electrophoresis, the gel was stained in 1 $\times$  TBE buffer (pH 8.0) containing 1 $\times$   
15 SYBR Green I Nucleic Acid Gel Stain (Thermo Fisher Scientific, USA) for 40 minutes. UV  
16 excited fluorescence images of the stained gel were taken using a Davinchi-Gel Imaging  
17 System (Davinchi-K, South Korea)

18

### 19 *Isothermal Ligase Reaction and SERS measurement*

20 FP2A (final 0.2  $\mu$ M) or FP2T (final 0.2 $\mu$ M) and Taq DNA ligase (final 3U/ $\mu$ l) was added into  
21 a solution containing FP1 modified AuNS (0.2 nM) in 20  $\mu$ L reaction buffer containing 20  
22 mM Tris-HCl (pH 7.6), 25 mM Mg(CH<sub>3</sub>COOH)<sub>2</sub>, 10 mM KCH<sub>3</sub>COOH, 1mM NAD and 0.1%  
23 Triton X-100 in the presence of various amount of target. <sup>2</sup> The mixture was incubated at 45  
24  $^{\circ}$ C for 1 hr. 10  $\mu$ l of the reacted samples were dried carefully on a cleaned glass by nitrogen  
25 gas. A spot (the diameter of the focused 633 nm laser is 1.03  $\mu$ m) of the sample was scanned  
26 10 times using 3 seconds of integration time for each scan using a confocal Raman  
27 microscope (LabRAM HR Evolution, HORIBA).

28

### 29 *References*

- 30 1. T. Pham, J. B. Jackson, N. J. Halas and T. R. Lee, *Langmuir*, 2002, **18**, 4915-4920.  
31 2. Martin Wiedmann, Wendy I. Wilson, John Czajka, Jianying Luo, Francis Barany, and Carl, A.  
32 Batt, Ligase chain reaction (LCR)--overview and applications., *Genome Res.* 1994, **3**, S51-  
33 S64

34

35

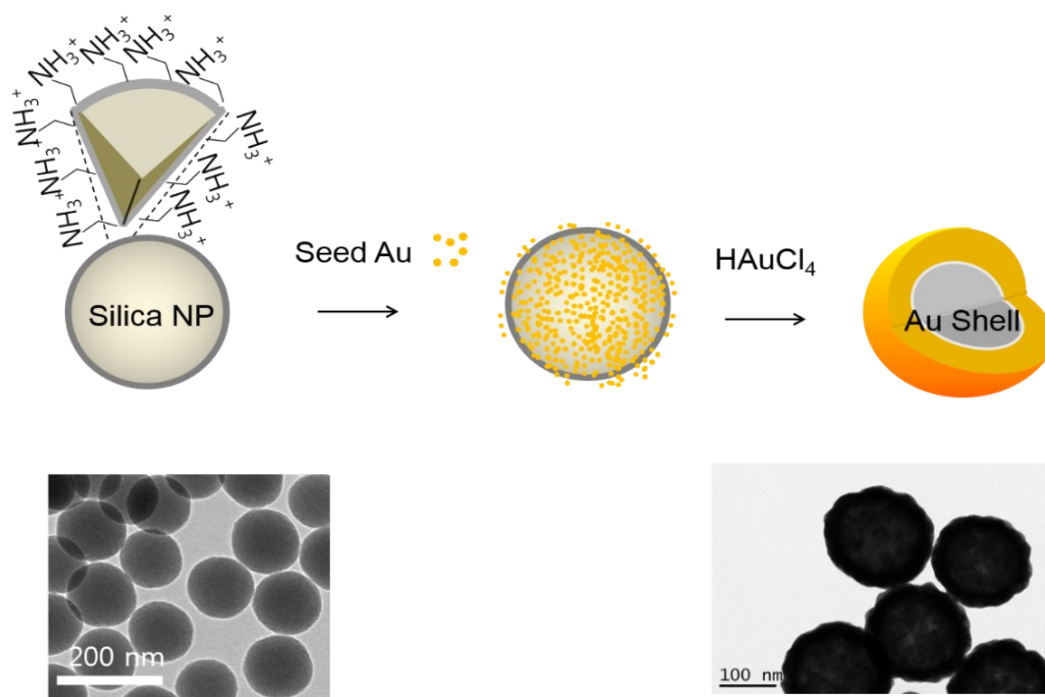

7 **Figure S1** Schematic illustration of the synthesis of AuNS. TEM image of amino-modified silica  
8 spheres(left) and AuNS(right).

1  
2  
3  
4  
5  
6  
7  
8  
9  
10  
11  
12  
13  
14  
15  
16  
17  
18  
19

**Table S1** Sequences of oligonucleotides used in the study.

| <i>Name</i>                | <i>Sequence</i>                       |
|----------------------------|---------------------------------------|
| FP1                        | 5'- (OP)- CAGCTCCAACA-(SH)-3'         |
| FP2A                       | 5'-TAMRA-AAG GAGCTGGTGGACCTACGCCAT-3' |
| FP2T                       | 5'-Cy3-AAG GAGCTGGTGGACCTACGCCAA-3'   |
| FP2AC                      | TTTTACGCCAT                           |
| 35G>A                      | TGG AGCTGATGGCGTA                     |
| 35G>T                      | TGG AGCTGTTGGCGTA                     |
| LPA (ligased FP1 and FP2A) | AAGGAGCTGGTGGACCTACGCCATCAGCTCCAACA   |
| 35G (wild target)          | TGG AGCTGGTGGCGTA                     |

1

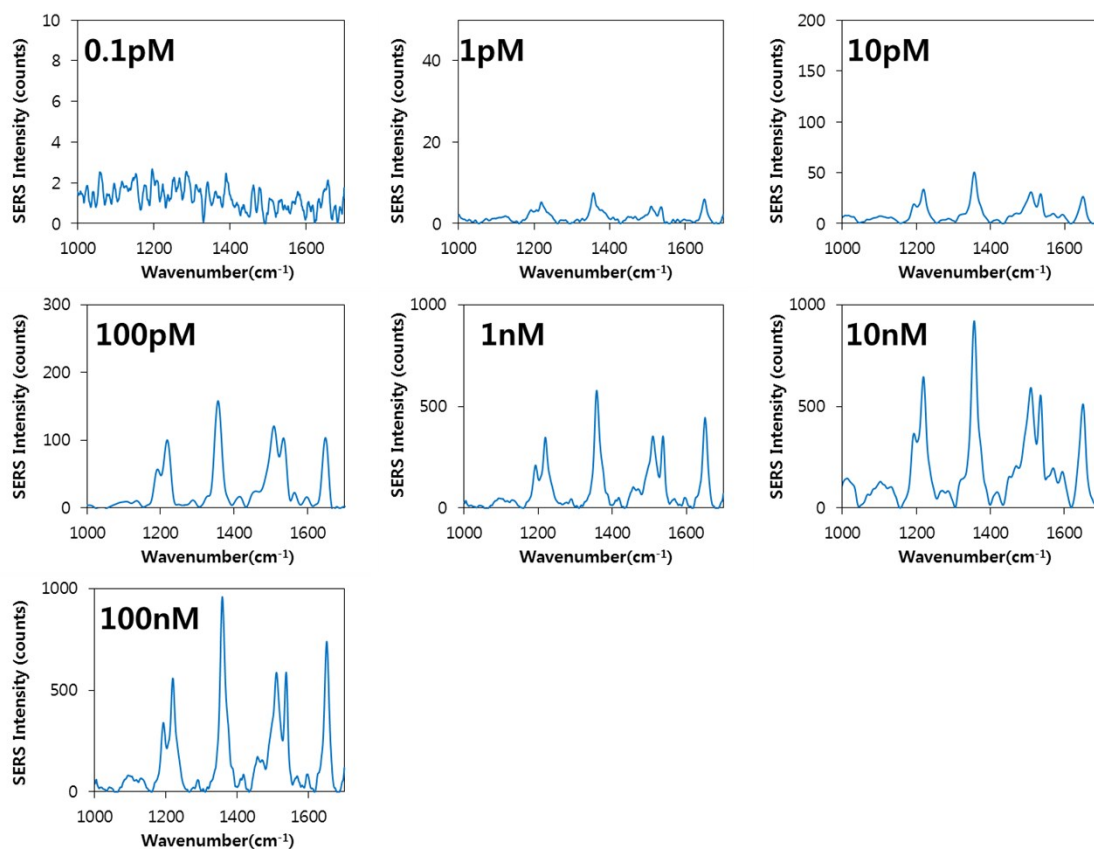

2

3

4 **Figure S2.** Obtained SERS in our assay depending on concentration of KRAS mutation (35G>A) as  
5 indicated on each graph.

6

7

8

9

10

11

12

13

14

15

16

17

18

19

1

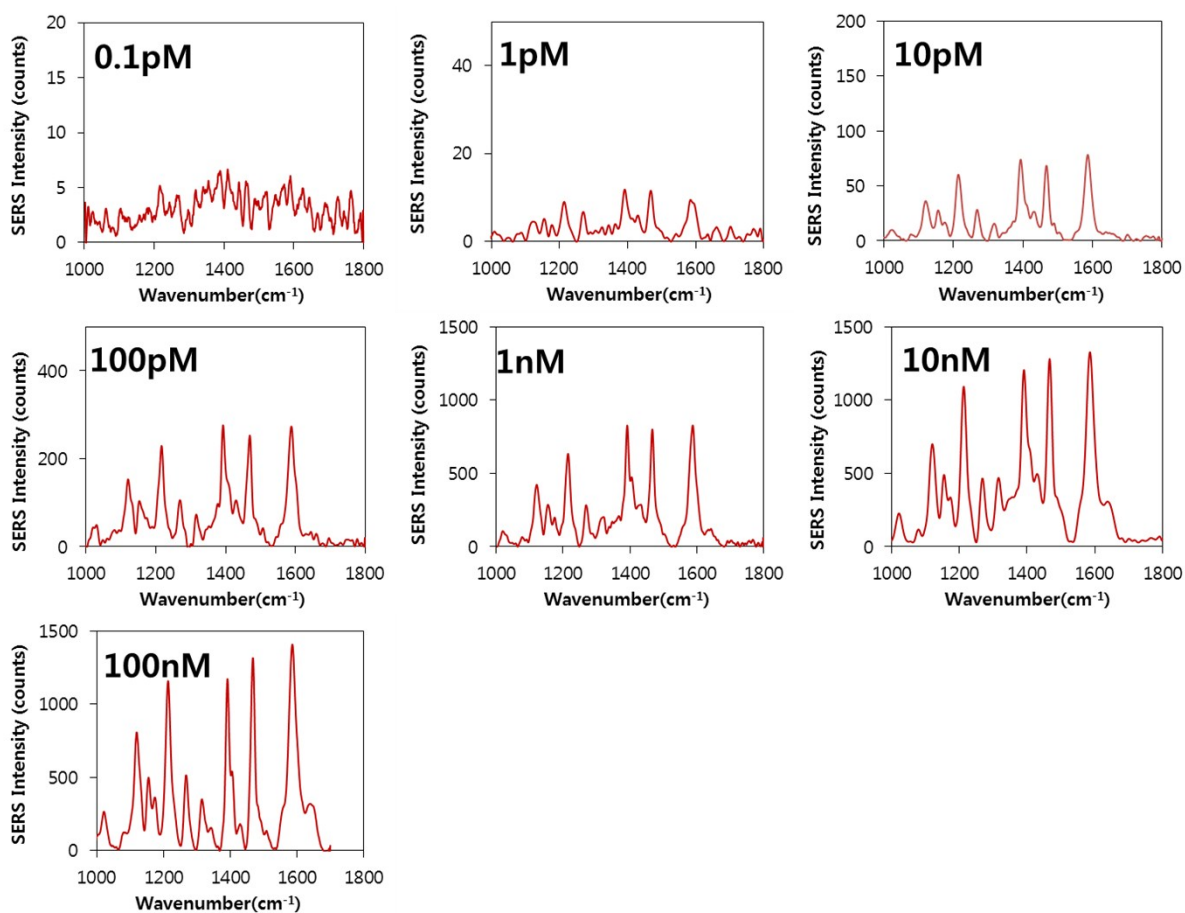

2

3 **Figure S3.** Obtained SERS in our assay depending on concentration of KRAS mutation (35G>T) as  
4 indicated on each graph

5

6

7
